# Supplementary material
Source: PubMed Central journal article supplement (PMC6266868)
Supplement: NIHMS994183-supplement-Supporting_Information.pdf [file NIHMS994183-supplement-Supporting_Information.pdf]

# European Journal of Immunology

Supporting Information

for

DOI 10.1002/eji.201747184

Teresa Prezzemolo, Krista E. van Meijgaarden, Kees L.M.C. Franken,  
Nadia Caccamo, Francesco Dieli, Tom H.M. Ottenhoff and Simone A. Joosten

**Detailed characterization of human *Mycobacterium tuberculosis* specific HLA-E  
restricted CD8<sup>+</sup> T cells**

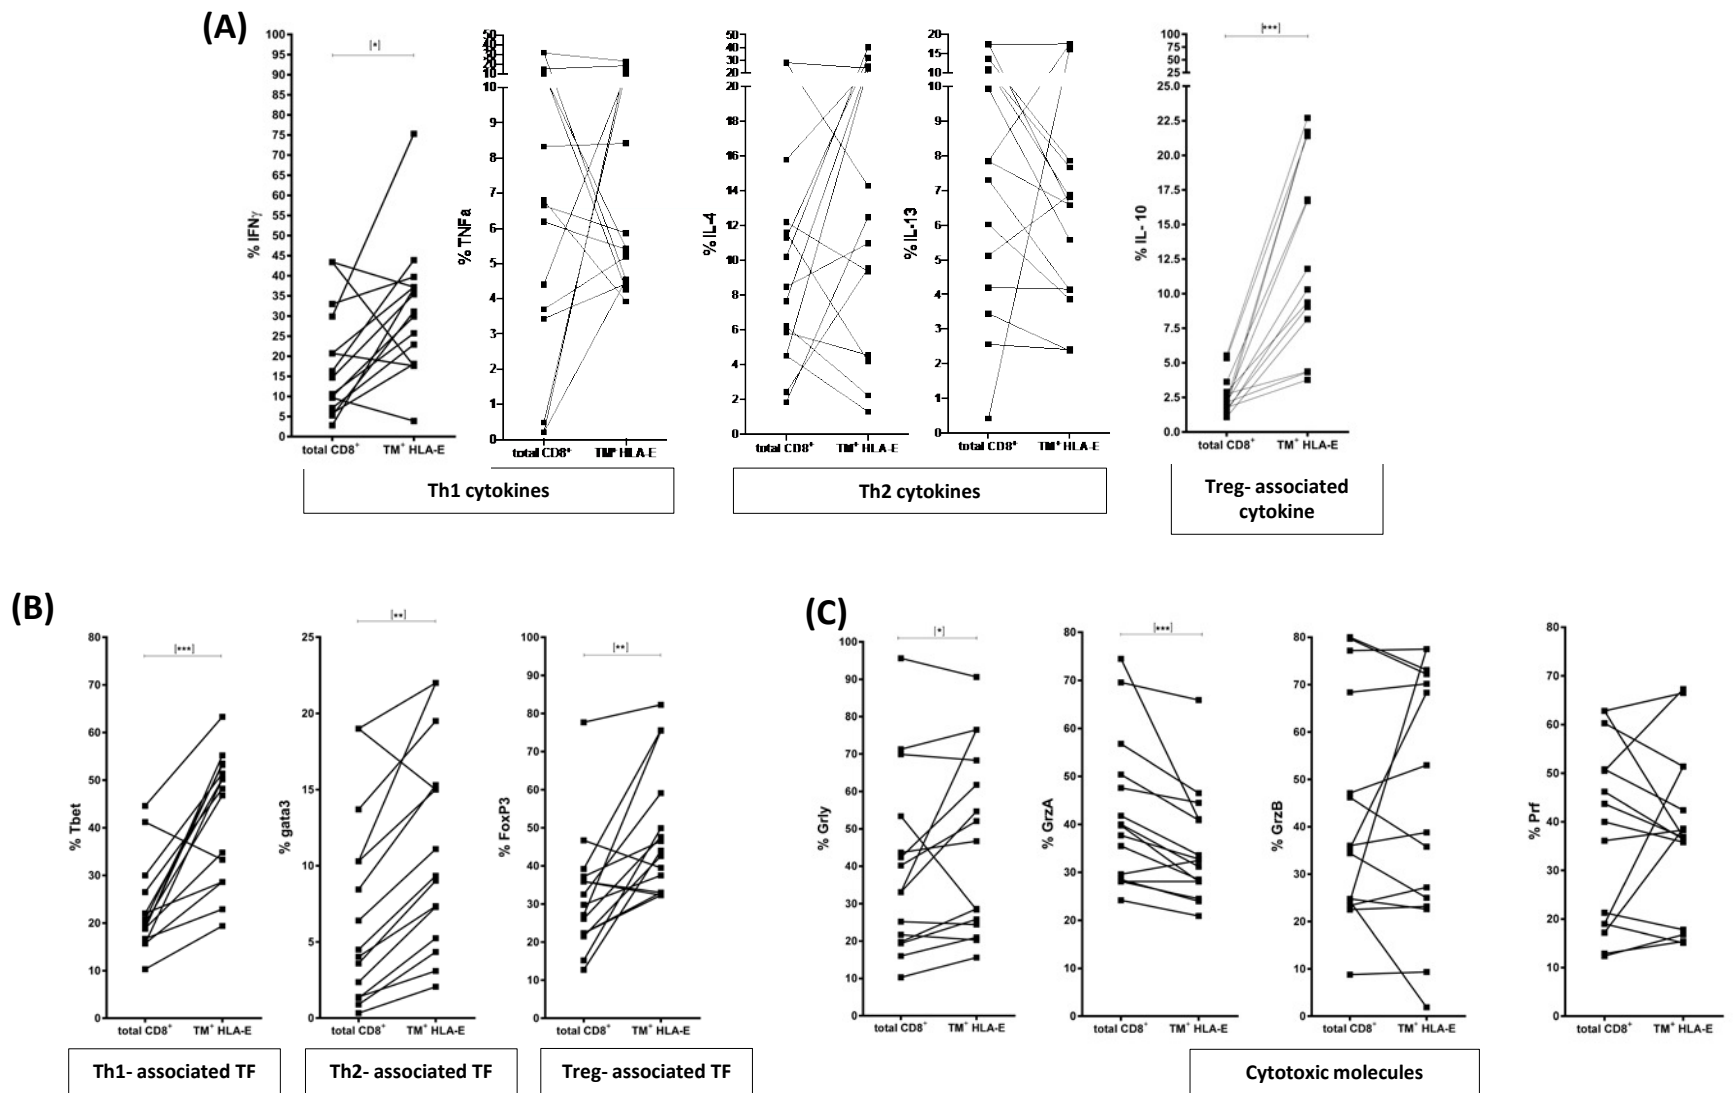

**Supplementary figure 1. Comparison of total CD8<sup>+</sup> T-cells and HLA-E/Mtb TM<sup>+</sup> CD8<sup>+</sup> T-cells in TB patients.**

Total CD8<sup>+</sup> T-cell production of IFN $\gamma$ , TNF $\alpha$ , IL-4, IL-13, and IL-10 **(A)**, expression of T-bet, Gata3 and FoxP3 transcription factors **(B)**, and Granulysin, Granzyme A, Granzyme B and Perforin **(C)** was compared to the HLA-E/Mtb TM<sup>+</sup> CD8<sup>+</sup> T-cells in active TB samples. P-values were calculated for active TB subjects only (n=15) using a Wilcoxon signed rank test.

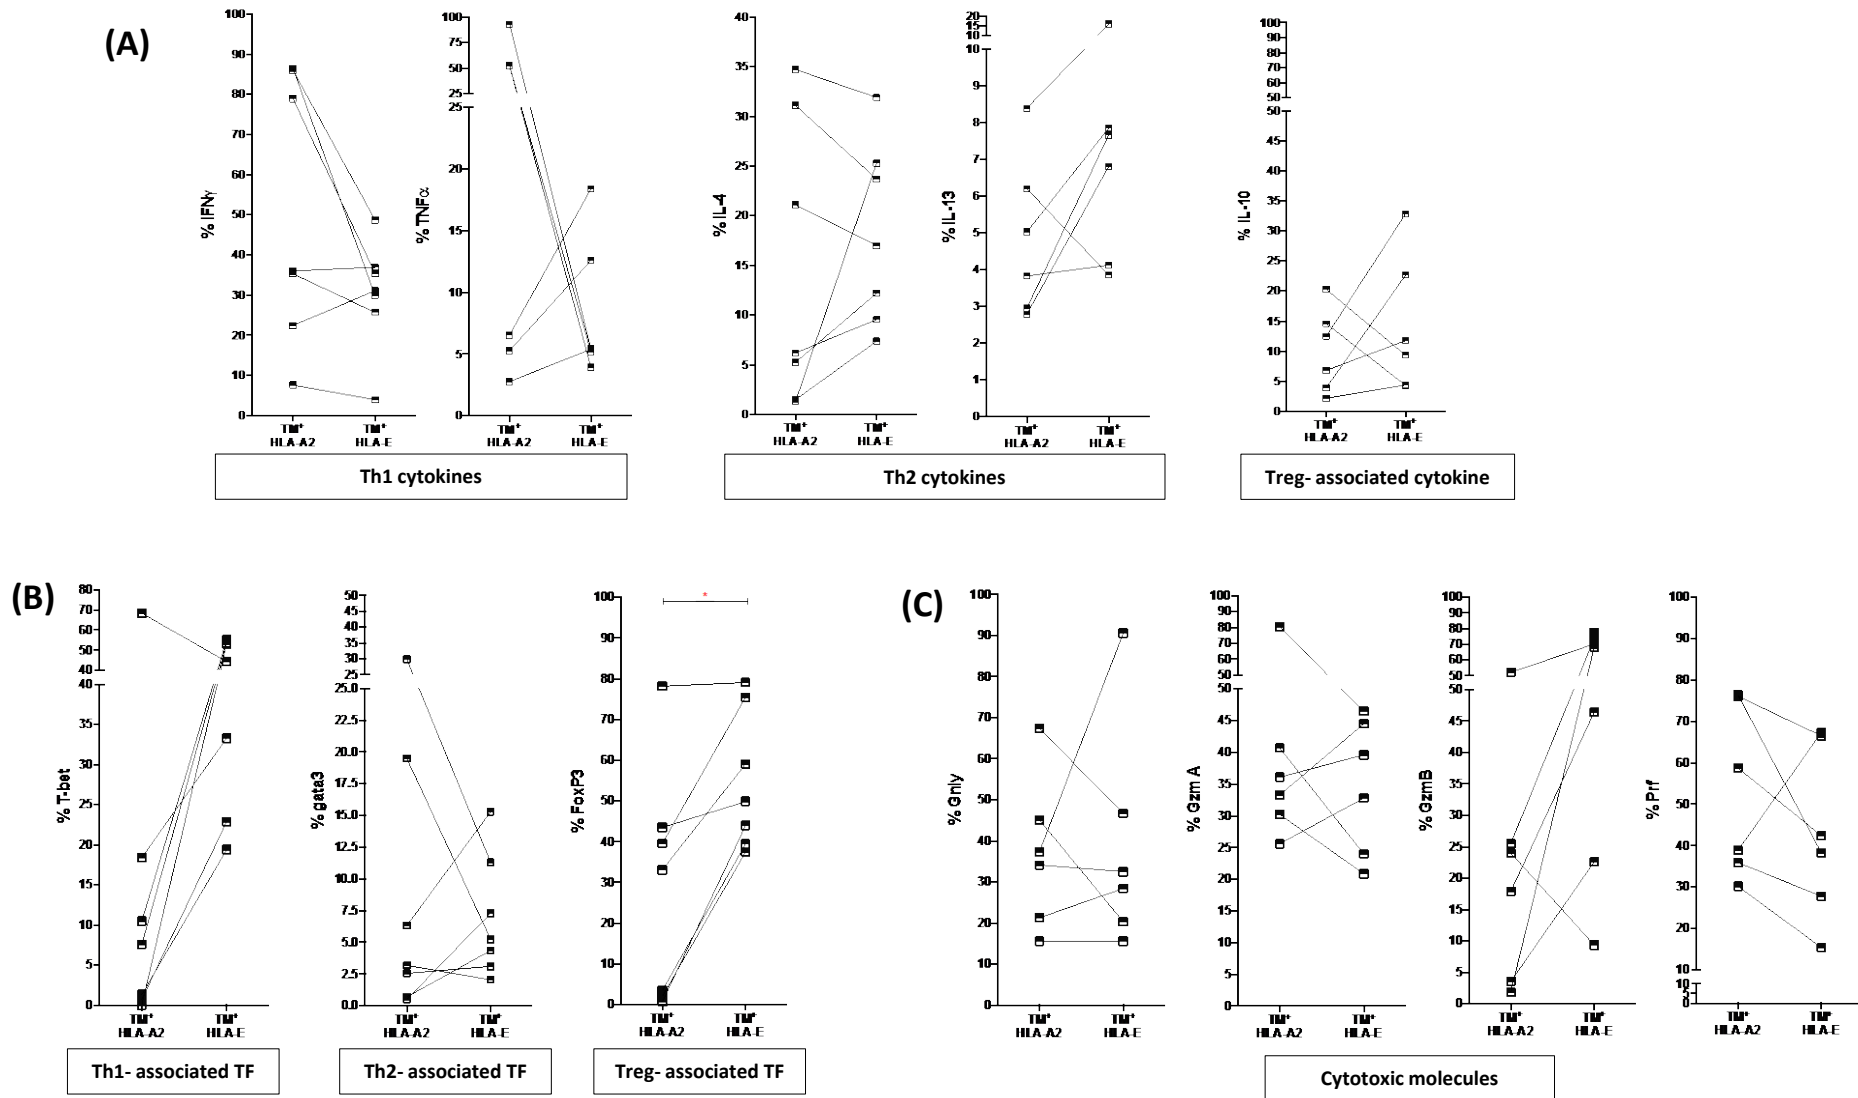

**Supplementary figure 2. Comparison of HLA-A2 and HLA-E TM<sup>+</sup> CD8<sup>+</sup> T-cells in TB patients.**

Frequency of HLA-A\*0201/Mtb and HLA-E/Mtb TM<sup>+</sup> CD8<sup>+</sup> T-cells of active TB patients producing IFN $\gamma$ , TNF $\alpha$ , IL-4, IL-13, and IL-10 **(A)**, expressing T-bet, Gata3 and FoxP3 transcription factors **(B)** and Granulysin, Granzyme A, Granzyme B and Perforin **(C)**. 7 out of 17 TB for panel A and 6 out of 17 TB for panel B were HLA-A\*0201<sup>+</sup>. P-values were calculated using a Wilcoxon signed rank test for active TB patients.
